## RESEARCH ARTICLE

# An exploration of the nomological network of trypophobia

Eric Mayor<sup>1\*</sup>, Andrea Meyer<sup>1</sup>, Alessandro Miani<sup>2</sup>, Roselind Lieb<sup>1</sup>

**1** Division of Clinical Psychology and Epidemiology, Department of Psychology, University of Basel, Basel, Switzerland, **2** Institute of Work and Organizational Psychology, University of Neuchâtel, Neuchâtel, Switzerland

\* [ericmarcel.mayor@unibas.ch](mailto:ericmarcel.mayor@unibas.ch)

## Abstract

### Background

Trypophobia is characterised by an aversion to or even revulsion for patterns of holes or visual stimuli featuring such patterns. Past research has shown that trypophobic stimuli trigger emotional and physiological reactions, but relatively little is known about the antecedents, prodromes, or simply covariates of trypophobia.

### Aim

The goals of this study were (a) to draw the contours of the nomological network of trypophobia by assessing the associations of symptoms of trypophobia with several constructs that were deemed relevant from past research on anxiety disorders and specific phobias, (b) to compare such associations with those found for symptoms of spider phobia and blood and injection phobia (alternative dependent variables), and (c) to investigate the main effect of gender on symptoms of trypophobia and replicate the association of gender with symptoms of spider phobia and blood and injection phobia (higher scores for women).

### Methods

Participants ( $N = 1,134$ , 53% men) in this cross-sectional study completed an online questionnaire assessing the constructs of interest.

### Results

Most assessed constructs typically associated with anxiety disorders (neuroticism, conscientiousness, anxiety sensitivity, trait anxiety, disgust sensitivity, and disgust propensity) were also associated with trypophobia in the predicted direction. All of these constructs were also associated with spider phobia and blood and injection phobia. Behavioral inhibition was negatively associated with trypophobia and spider phobia—contrary to what was expected, but positively with blood and injection phobia. We found no gender difference in trypophobia, whereas women scored higher on spider phobia and blood and injection phobia.

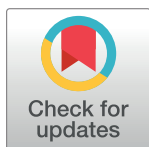

## OPEN ACCESS

**Citation:** Mayor E, Meyer A, Miani A, Lieb R (2021) An exploration of the nomological network of trypophobia. PLoS ONE 16(9): e0257409. <https://doi.org/10.1371/journal.pone.0257409>

**Editor:** Stephan Doering, Medical University of Vienna, AUSTRIA

**Received:** April 19, 2021

**Accepted:** September 1, 2021

**Published:** September 14, 2021

**Copyright:** © 2021 Mayor et al. This is an open access article distributed under the terms of the [Creative Commons Attribution License](https://creativecommons.org/licenses/by/4.0/), which permits unrestricted use, distribution, and reproduction in any medium, provided the original author and source are credited.

**Data Availability Statement:** The data for this study is available on the Open Science Framework platform (<https://osf.io/5bz2tr/>).

**Funding:** The author(s) received no specific funding for this work.

**Competing interests:** The authors have declared that no competing interests exist.

## Discussion

Although some differences were observed, the nomological network of tryphobia was largely similar to that of spider phobia and blood and injection phobia. Further studies are needed to clarify similarities and dissimilarities between tryphobia and specific phobia.

## Introduction

Anxiety disorders have been shown to constitute one of the largest groups of mental disorders. Their estimated 12-month (lifetime) prevalence was reported to be 22.7% (33.3%) among women and 13% (22%) among men in the United States [1] and in the range of 5.6% to 19% (13.6% to 28%) worldwide [2]. In particular, specific phobias are a serious health concern in the population that can start during childhood/adolescence: Research has shown specific phobias to be highly represented among these disorders and to have one of the earliest ages of onset [3]. In the United States, their 12-month (lifetime) prevalence was reported to be 12% (16.1%) in women and 5.5% (9%) in men [1]. In Europe, the reported range of 12-month prevalence of specific phobia was 3.1% to 11% [4]. According to the fifth edition of the *Diagnostic and Statistical Manual of Mental Disorders (DSM-5)*, specific phobias entail “fear or anxiety [that] is circumscribed to the presence of a particular situation or object” [5, p. 198]. Such objects can be, for instance, animals, the natural environment, or blood, injection, and injury, and situations include airplanes and elevators, among others.

Tryphobia has been defined as an aversion to or even revulsion for patterns of holes or visual stimuli featuring such patterns [6] leading to physiological reactions (e.g., cardiovascular [7,8]; haemodynamic [7]; electrodermal changes [8]; pupil constriction [9]; late positive potential amplitude [10]; early posterior negativity [11]) and subjective reactions (disgust more than fear, skin-crawling sensation [6,8,9]) to confrontation with these stimuli. Studies have shown that whereas non-tryphobic individuals presented aversion only to disease-relevant tryphobic stimuli, tryphobic individuals did so to both disease-relevant and disease-irrelevant stimuli [6]. Estimates of the percentage of individuals feeling disturbed by tryphobic images could be 14% or higher [12]. Tryphobia has not yet qualified as a specific phobia according to the criteria of the *DSM-5*; or at best be classified under the unspecific category-specific phobia, Other Type.

Much of the literature on tryphobia has been dedicated to the (neuro)physiological reactions to tryphobic stimuli (e.g., [8,11]) and the characteristics of tryphobic images linked with aversion (e.g., [13]). The nomological network of tryphobia has to date been largely unexplored. Indeed, research has only sporadically examined potential antecedents, prodromes, or simply covariates of tryphobia. Researchers have found that 20% of respondents recruited from a tryphobia support group had one or more specific phobias, 19% had been diagnosed with major depression, 17% with generalized anxiety disorder, but only 2% with obsessive compulsive disorder [14]. Most individuals in this support group reported suffering from mild to severe psychological distress and impairment [14], which is higher than what was found in individuals with specific phobias [15]. Survey-based studies usually used the Tryphobia Questionnaire (TQ) [16] to measure symptoms of tryphobia. A study found a weak relationship between trait anxiety and such symptoms—but only in a cohort of tryphobic individuals; furthermore, the study found no difference in trait anxiety between participants from a tryphobia support group and those from a university group [16]. Generalized anxiety was not found to be correlated with symptoms of tryphobia [13]. Positive relationships were

reported between symptoms of tryphobia and, notably, disgust sensitivity [17] and pathogen disgust [6].

## The current study

Research on tryphobia has surprisingly been conducted mostly without considering the literature on specific phobia, despite similarities in theories of the origins of tryphobia and specific phobia. Indeed, several theories on the etiology of both tryphobia and specific phobia have emphasized notions akin to *preparedness*. Preparedness refers to the idea that stimuli reminiscent of evolutionarily relevant threats are more commonly feared than other stimuli [18].

With regard to specific phobia, the preparedness framework was proposed in the 1970s [19] to account for the inability of the then-dominant behaviorist paradigm (e.g., [20,21]) to explain why some classes of stimuli were considered threatening by many individuals before ever being exposed to them, and the difficulty of extinguishing the then-assumed solely ‘conditioned’ response to these classes of stimuli [18]. In a similar vein, non-associative theory has explained the existence of anxious reactions to some stimuli from the first encounter as a fear response that at some point enhanced the odds of survival [22]. Building upon the preparedness framework, fear module theory suggested the existence of a selective and automatic neural circuitry “sensitive to stimuli that have been correlated with threatening encounters in the evolutionary past” [22, p. 485]. This module has further been deemed impervious to conscious influence [23].

With regard to tryphobia, some researchers suggested that tryphobic stimuli might evoke patterns related to dangerous animals in the evolutionary past, such as venomous organisms, which would trigger an aversion response [12]. This explanation was discarded in a study with preschoolers who performed an implicit association test [24]. The second evolutionary explanation was related to the behavioral immune system: Pathogen cues and associated stimuli elicit avoidance due the emotional responses triggered by them (disgust, fear [25]). Individuals suffering from tryphobia might produce overgeneralized disease avoidance responses to tryphobic stimuli that have only a slight resemblance to disease-relevant cues [6]. There has been some support for this explanation, as pathogen disgust significantly predicted aversion to tryphobic stimuli [6]. Another explanation for tryphobia was that discomfort could stem from the repeating patterns themselves (characterized by excess energy at low and midrange spatial frequencies), which could deviate too much from natural images (e.g., [16]). Some studies have found support for this explanation [16,26].

Our study contributes in three main ways to the literature. First, we sought to assess whether several constructs that were deemed relevant from past research on anxiety disorders and specific phobias are associated with tryphobia (Aim A). Indeed, examining variables linked with specific phobias was a first step in discovering the nomological net of tryphobia and whether it was similar to that of specific phobia. One particular reason we considered this issue worth investigating was that whether tryphobia could be grouped under the diagnostic category of a specific phobia has to date not been established, as the argument that disgust reactions to stimuli predominate over fear in tryphobia [9,24] was far from convincing: Notably, a similar pattern has been found in blood and injection phobia [27,28].

Second, we sought to examine whether these associations were also found in spider phobia and blood and injection phobia (Aim B). These two subtypes of specific phobias were chosen because they have frequently been compared in the literature on account of the distinctiveness of their physiological (e.g., [29,30]) and emotional (e.g., [31–33]) features.

Past research has shown women to be more susceptible to anxiety disorders than men, including specific phobias [1], but the validation studies of the instrument used to assess tryphobia did not include tests of gender differences in tryphobia symptoms [8,16]. A third contribution of the study is thus that we sought to determine the impact of gender on tryphobia (Aim C). We also investigated whether such gender effects could be replicated with regard to our other dependent variables (DVs).

We now present the associations in the literature of the constructs we have selected as well as our hypotheses.

### **Behavioral inhibition**

Behavioral inhibition (the “tendency to withdraw from novel situations” [34, p. 133]) was shown to constitute a generic vulnerability to anxiety and anxiety disorders [35]. Behavioral inhibition (either current or retrospective) was found to be positively related to specific phobias [36–38]. This variable has also been found to be related to disgust sensitivity, which has been associated with specific phobia and emotional reactions to phobic stimuli [39,40]. We hypothesized behavioral inhibition to be positively related to symptoms of tryphobia (H1A), spider phobia (H1B), and blood and injection phobia (H1C).

### **Personality**

A meta-analysis showed that individuals presenting with specific phobias had higher neuroticism and lower conscientiousness than those not presenting with these disorders [41]. One study failed to establish a relationship between neuroticism and tryphobia [6]. These negative results have not been replicated since. We hypothesized neuroticism to be positively related to symptoms of tryphobia (H2A), spider phobia (H2B), and blood and injection phobia (H2C) and conscientiousness to be negatively related to these DVs (H3A, H3B, and H3C, respectively).

Research has to date been inconclusive with regard to the association of specific phobia with extraversion, agreeableness, and openness to experience: These dimensions of personality reportedly have negative, positive, or non-significant associations with specific phobia in similar proportions, leading to non-significant bivariate associations in a meta-analysis [41]. Here, we analysed the role of these dimensions exploratively to see if they were similarly associated with each of our DVs.

### **Anxiety sensitivity**

Anxiety sensitivity (the interpretation of anxiety manifestations as dangerous and fear thereof) has been proposed as an explanation for the development and maintenance of social phobia and other anxiety disorders (see [42]). Studies have shown that individuals presenting with anxiety disorders—including specific phobia—had higher anxiety sensitivity scores than non-clinically anxious individuals (e.g., [43]). Another meta-analysis further showed that the level of anxiety sensitivity in specific phobia was not different from that in other anxiety disorders [44]. To our knowledge, no study has examined the relationship of anxiety sensitivity to tryphobia. We hypothesized anxiety sensitivity to be positively related to symptoms of tryphobia (H4A), spider phobia (H4B), and blood and injection phobia (H4C).

### **Trait anxiety**

Research has shown trait anxiety (the dispositional tendency to be fearful, worried, and/or anxious) to be related to spider phobia and blood and injection phobia (albeit not controlling

for disgust propensity) and obsessive-compulsive disorder [45]. Trait anxiety and tryphobia have been found to be related among tryphobic participants but not in other participants [16]. We hypothesized trait anxiety to be positively related to symptoms of tryphobia, (H5A), spider phobia (H5B), and blood and injection phobia (H5C).

## Disgust

Disgust propensity (the propensity to react with disgust) and disgust sensitivity (anxious apprehension concerning experiencing disgust) have been reported to be associated with anxiety disorders generally and with subtypes of specific phobias—with some differences between subtypes [32,33,45]. Disgust sensitivity was found to be related to tryphobia [6,17]. We hypothesized disgust sensitivity to be positively related to tryphobia (H6A), spider phobia (H6B), and blood and injection phobia (H6C). We also hypothesized disgust propensity to be positively related to these variables (H7A, H7B, and H7C, respectively).

## Gender

Previous studies on specific phobias have shown that women are more likely to present with these disorders (e.g., [1]). To further assess the similarity of covariates of tryphobia and specific phobias, we hypothesized women would score higher on tryphobia symptoms (H8A), and we expected to replicate existing findings on gender differences in symptoms of spider phobia (H8B) and blood and injection phobia (H8C).

## Methods

### Participants

Participants ( $N = 1,134$ , 53% men) were Mechanical Turk workers (MTurkers) with a task acceptance rate of 95% or higher who resided in the United States and successfully passed attention checks. Using an a priori power analysis in G\*Power, we obtained the following results for partial correlation (see Data analysis below). Given  $\alpha = .05$  and  $\beta = .2$ , that is, power = .8, for a large effect size ( $f^2 = .35$ ),  $N = 25$  was required; for a medium effect size ( $f^2 = .15$ ),  $N = 55$  was required; and for a small effect size ( $f^2 = .02$ ),  $N = 395$  was required. Thus, our sample was large enough to detect very small partial correlation coefficients. The population of MTurkers has not been found to be representative of the U.S. population; for instance, MTurkers were reported to be more educated, more often unemployed, and more often Caucasian, as well as more frequently agnostic or atheist than in the general U.S. population, but much less often retired: 1.3% versus 21% [46]. This study was approved by the research ethics commission of the University of Basel and was conducted in accordance with the principles expressed in the Declaration of Helsinki. The data for this study are available on the Open Science Framework platform (<https://osf.io/5bz2r/>).

### Procedure

Participants completed an online questionnaire in January 2020. An informed consent form was displayed to participants as part of the task description on Mechanical Turk and on the first page of the online questionnaire. On the informed consent form, participants were informed of the general aim of the study, that they would fill in different questionnaires related to that aim, and of their right to withdraw from the study with no consequences other than forfeiting their compensation. Participants were compensated at the U.S. federal hourly minimal wage of USD 7.25 (USD 3.05 for an estimated 25 min of their time). We included attention checks as an additional step in screening inadequate participation. This has been shown to

lead to higher quality of data in MTurkers than in subject pool participants [47]. The first attention check was presented as an independent question and is provided in the [S1 Appendix](#). The second and third attention checks were additional items embedded in the TQ (“Select moderately here”) and the Fear of Spiders Questionnaire (FSQ; “Currently, I pay attention. Select ‘five’ to show attention to spider questionnaires”).

## Measures

All measures were self-reported and had adequate to high reliability (all Cronbach’s alphas  $> .71$ ). The predictor variables used in this study were behavioral inhibition; the Big Five personality dimensions: neuroticism, conscientiousness, extraversion, agreeableness, and openness to experience; anxiety sensitivity; trait anxiety; disgust sensitivity; and disgust propensity.

**Behavioral inhibition.** To measure behavioral inhibition, we used the 16-item Adult Measure of Behavioral Inhibition (AMBI [34]). Items are scored on a 3-point Likert scale (0 = *no/hardly ever*, 1 = *some of the time*, and 2 = *yes/most of the time*). We used the AMBI total score, which showed good reliability (reported alpha = .87), although subscores could also be computed: fearful inhibition (example item: “Do you tend to observe strangers from a distance first, before being able to mix in?”), non-approach (e.g., “Do you tend to introduce yourself to new people?”, reversed), low sociability (e.g., “Do you tend to choose solitary leisure activities over spending time with close friends?”), and risk avoidance (e.g., “If physically able, would you enjoy adventure holidays with some element of risk?”). Reported alphas ranged from .52 to .86. The AMBI total score has a strong correlation with the total score of the Retrospective Measure of Behavioral Inhibition, a retrospective measure of childhood temperament ( $r = .73$ ; [34]; for related work on specific phobias using the latter scale, see [36]). In our sample, Cronbach’s alpha was .82.

**Big five personality traits.** The HEXACO–60 [48] is a 60-item instrument measuring the Big Five personality traits and honesty–humility (which we did not analyze in this study). It is composed of the following subscales: Emotionality (= neuroticism, example item: “I would feel afraid if I had to travel in bad weather conditions”), extraversion (e.g., “The first thing that I always do in a new place is to make friends”), agreeableness (e.g., “My attitude toward people who have treated me badly is ‘forgive and forget’”), conscientiousness (e.g., “I plan ahead and organize things, to avoid scrambling at the last minute”), openness to Experience (e.g., “I’m interested in learning about the history and politics of other countries”), and honesty–humility (e.g., “I wouldn’t use flattery to get a raise or promotion at work, even if I thought it would succeed”). Each subscale has 10 items, with good reported internal reliabilities (all alphas  $> .72$ ). The items are scored on a 5-point Likert scale (ranging from 1 = *strongly disagree* to 5 = *strongly agree*). The HEXACO has been used most frequently in personality psychology but has also been used in clinical psychology (more rarely) and other fields [49]. We note that much of the research relating personality to specific phobia used the Eysenck Personality Inventory [50] or the Eysenck Personality Questionnaire [51], with which one cannot assess the five-factor model of personality. In the present study, Cronbach’s alphas were .72 for neuroticism, .77 for extraversion, .73 for agreeableness, .79 for conscientiousness, and .76 for openness to experience.

**Anxiety sensitivity.** Anxiety sensitivity was assessed with the Anxiety Sensitivity Index–3 [52]. This 18-item instrument is composed of three subscales (six items each) with good reliability (all reported alphas  $> .78$ ): physical concerns (“When my stomach is upset, I worry that I might be seriously ill”), cognitive concerns (“When my thoughts seem to speed up, I worry that I might be going crazy”), and social concerns (“It is important for me not to appear nervous”). Items are scored on a 5-point Likert scale (0 = *very little* to 4 = *very much*). We used the total sum score in our study, for which Cronbach’s alpha was .95.



**Trait anxiety.** Trait anxiety was assessed with the short form of the trait version of the State Trait Anxiety Inventory (STAI; six items [53]). Items (e.g., “I feel upset”) are scored on a 4-point Likert scale ranging from 1 = *not at all* to 4 = *very much*. The reported correlation of the short form with the full-length STAI is .9. In our study, Cronbach’s alpha was .82.

**Disgust propensity and sensitivity.** Disgust propensity and disgust sensitivity were measured using the Disgust Propensity and Sensitivity Scale–Revised ([32]), composed of 16 items, eight for each subscale (good reliability: both alphas > .86). The items are scored on a 5-point Likert scale (from 1 = *never* to 5 = *always*). Example items include “Disgusting things make my stomach turn” for disgust propensity and “When I feel disgusted, I worry that I might pass out” for disgust sensitivity. In our study, Cronbach’s alphas were .87 for disgust propensity and .89 for disgust severity.

The DVs used in this study were symptoms of tryphobia, spider phobia, and blood and injection phobia.

**Symptoms of tryphobia.** For the assessment of symptoms of tryphobia, our main DV, we used the TQ [16], composed of 17 items. The items (e.g., “Feel uncomfortable or uneasy” [when looking at tryphobic stimuli]) are scored on a Likert scale from 1 = *not at all* to 5 = *extremely*. The instrument has an excellent reported reliability (reported alpha = .96). In our study, Cronbach’s alpha was .98.

**Symptoms of blood and injection phobia.** Symptoms of blood and injection phobia were measured using the 17-item (response options: Yes/No) Blood-Injection Symptom Scale [54]. We used the total score, for which the reliability is good (reported alpha = .86), although three subscales can be computed with questionable reliability (alphas ranging from .56 to .72): the faintness subscale (example item: “Were you dizzy or lightheaded?” [when confronted with situations involving blood or injections]), the anxiety subscale (e.g., “Were you anxious?”), and the tension subscale (“Were you particularly irritable?”). In our study, Cronbach’s alpha was .90.

**Symptoms of spider phobia.** Spider phobia was assessed using the 18-item FSQ [55]. Items are rated on an 8-point Likert scale (0 = *strongly disagree* to 7 = *strongly agree*). An example item is “If I came across a spider now, I would get help from someone else to remove it”. The questionnaire has good reliability (alpha = .92). In our study, Cronbach’s alpha was .98.

**Sociodemographic variables.** We recorded age, gender, occupation, and educational attainment) as sociodemographic variables. Table 1 presents this information for our sample.

## Data analysis

We performed *t* tests of mean differences in the study variables between women and men and zero-order correlation tests of these variables with age in R. As we expected gender and age to be related to the study variables, we used partial correlation coefficients when computing associations between study variables (in SPSS), controlling for gender and age. For all analyses, the significance threshold was  $p < .05$ .

## Results

Table 2 presents the descriptive statistics and *t* tests for mean differences between women and men for the scales used in this study as well as zero-order correlations of these variables with age. It can be seen that men scored lower on the majority of the scales but higher on extraversion. Age is negatively related to most variables but positively related to extraversion, conscientiousness, and openness to experience. Agreeability is associated with neither gender nor age. The partial correlation coefficients between our study variables are presented in Table 3. Those between tryphobia, spider phobia, and blood and injection phobia and all other constructs thereby refer to the hypotheses as stated above (shaded area in Table 3).

**Table 1. Sociodemographic variables.**

| Variable                          | Frequency | Percent |
|-----------------------------------|-----------|---------|
| Gender                            |           |         |
| Men                               | 603       | 53.17   |
| Women                             | 531       | 46.83   |
| Employment status                 |           |         |
| Working full-time                 | 922       | 81.31   |
| Working part-time                 | 105       | 9.26    |
| Unemployed                        | 47        | 4.14    |
| On parental leave                 | 5         | 0.44    |
| Retired                           | 23        | 2.03    |
| Other                             | 32        | 2.82    |
| Education                         |           |         |
| Primary school                    | 1         | 0.09    |
| High school                       | 94        | 8.29    |
| Some college/university           | 196       | 17.28   |
| Graduated from college/university | 596       | 52.56   |
| Master's/postgraduate             | 233       | 20.55   |
| Doctoral level                    | 12        | 1.06    |
| Other                             | 2         | 0.18    |

Note.  $N = 1,134$ . Participants were on average 38.26 years old ( $SD = 10.59$ ).

<https://doi.org/10.1371/journal.pone.0257409.t001>

**Table 2. Descriptive statistics ( $N = 1,134$ ).**

| Variable       | Range | <i>M</i> | <i>SD</i> | <i>Median</i> | $t_{\text{Gender}}$ | $r_{\text{Age}}$ |
|----------------|-------|----------|-----------|---------------|---------------------|------------------|
| AMBI           | 0–32  | 18.86    | 5.84      | 18            | −3.47 *             | −0.06 *          |
| N <sup>#</sup> | 1–5   | 3.17     | 0.63      | 3.2           | −10.52 *            | −0.06 *          |
| E <sup>#</sup> | 1–5   | 3.10     | 0.71      | 3.2           | 3.67 *              | 0.11 *           |
| A <sup>#</sup> | 1–5   | 3.30     | 0.64      | 3.2           | 0.11                | 0.04             |
| C <sup>#</sup> | 1–5   | 3.54     | 0.7       | 3.5           | −3.80 *             | 0.18 *           |
| O <sup>#</sup> | 1–5   | 3.46     | 0.69      | 3.3           | −0.34               | 0.08 *           |
| ASI            | 0–72  | 29.69    | 18.01     | 31            | −0.27               | −0.17 *          |
| STAI           | 0–24  | 5.94     | 4.09      | 6             | −2.79 *             | −0.15 *          |
| D. PRO         | 8–40  | 23.46    | 6.59      | 24            | −4.49 *             | −0.03            |
| D. SEN         | 8–40  | 21.20    | 7.72      | 21            | −1.20               | −0.14 *          |
| TQ             | 17–85 | 37.95    | 19.71     | 33            | 0.38                | −0.18 *          |
| BISS           | 0–17  | 4.94     | 4.77      | 4             | −2.40 *             | −0.08 *          |
| FSQ            | 0–126 | 49.64    | 39.45     | 53            | −2.53 *             | −0.16 *          |

Note. AMBI: Adult Measure of Behavioral Inhibition; N: Neuroticism (emotionality); E: Extraversion; A: Agreeableness; C: Conscientiousness; O: Openness to experience; ASI: Anxiety Sensitivity Index; STAI: State Trait Anxiety Inventory (trait scale); D. PRO: Disgust propensity; D. SEN: Disgust sensitivity; TQ: Trypophobia Questionnaire; BISS: Blood and Injection Symptom Scale; FSQ: Fear of Spiders Questionnaire.

<sup>#</sup>: Average scores computed; for all other scales we used sum scores.

$t_{\text{Gender}}$ : *t*-test of mean differences between the sexes with 1,132 degrees of freedom (a positive value represents a higher mean for men).  $r_{\text{Age}}$ : Zero-order correlation of age with the study variables.

\*:  $p < .05$ .

<https://doi.org/10.1371/journal.pone.0257409.t002>



**Table 3. Partial correlations among the study variables (N = 1,134).**

| Variable   | 1    | 2    | 3    | 4    | 5    | 6    | 7   | 8   | 9    | 10  | 11  | 12  | 13 |
|------------|------|------|------|------|------|------|-----|-----|------|-----|-----|-----|----|
| 1. AMBI    | –    |      |      |      |      |      |     |     |      |     |     |     |    |
| 2. N       | .28  | –    |      |      |      |      |     |     |      |     |     |     |    |
| 3. E       | –.71 | –.31 | –    |      |      |      |     |     |      |     |     |     |    |
| 4. A       | –.10 | –.07 | .23  | –    |      |      |     |     |      |     |     |     |    |
| 5. C       | .22  | –.06 | .02  | .26  | –    |      |     |     |      |     |     |     |    |
| 6. O       | .04  | –.01 | .11  | .26  | .44  | –    |     |     |      |     |     |     |    |
| 7. ASI     | .02  | .34  | –.09 | –.22 | –.52 | –.31 | –   |     |      |     |     |     |    |
| 8. STAI    | .24  | .38  | –.44 | –.32 | –.32 | –.24 | .48 | –   |      |     |     |     |    |
| 9. D. PRO  | .10  | .31  | –.10 | –.17 | –.29 | –.24 | .68 | .40 | –    |     |     |     |    |
| 10. D. SEN | .02  | .33  | –.07 | –.18 | –.47 | –.34 | .83 | .49 | 0.81 | –   |     |     |    |
| 11. TQ     | –.16 | .13  | .10  | –.15 | –.55 | –.37 | .72 | .38 | .60  | .72 | –   |     |    |
| 12. BISS   | .07  | .20  | –.10 | –.15 | –.18 | –.13 | .47 | .37 | .42  | .49 | .46 | –   |    |
| 13. FSQ    | –.07 | .22  | .01  | –.14 | –.45 | –.36 | .69 | .36 | .60  | .68 | .72 | .42 | –  |

Note. Shaded areas refer to the hypotheses as stated in the introduction. Correlation coefficients higher than .058 are significant at  $p < .05$ . Correlations in italics are not significant. AMBI: Adult Measure of Behavioral Inhibition; N: Neuroticism (emotionality); E: Extraversion; A: Agreeableness; C: Conscientiousness; O: Openness to experience; ASI: Anxiety Sensitivity Index; STAI: State Trait Anxiety Inventory (trait scale); D. PRO: Disgust propensity; D. SEN: Disgust sensitivity; TQ: Trypophobia Questionnaire; BISS: Blood and Injection Symptom Scale; FSQ: Fear of Spiders Questionnaire.

<https://doi.org/10.1371/journal.pone.0257409.t003>

### Associations with tryphobia

Behavioral inhibition was negatively related to tryphobia, contrary to H1A. Neuroticism (emotionality) was positively associated with tryphobia. This confirmed H2A. Conscientiousness was negatively linked to tryphobia, as predicted in H3A. Anxiety sensitivity was positively related to tryphobia (H4A). Trait anxiety was positively associated with tryphobia as well (H5A). Disgust propensity and disgust sensitivity were both positively related to tryphobia (H6A and H7A). Contrary to H8A, women ( $M = 37.71$ ,  $SD = 19.71$ ) did not score higher on tryphobia symptoms than men ( $M = 38.15$ ,  $SD = 19.73$ ),  $t = 0.375$ ,  $p = .707$ , Cohen's  $d = 0.02$ .

### Associations with spider phobia

Behavioral inhibition was negatively related to spider phobia symptoms, contrary to H1B. Neuroticism (in agreement with H2B), conscientiousness (negatively; H3B), anxiety sensitivity (H4B), trait anxiety (H5B), disgust sensitivity (H6B), and disgust propensity (H7B) were all related to spider phobia symptoms in the expected direction. As hypothesized (H8B), women ( $M = 52.79$ ,  $SD = 39.54$ ) scored higher on spider phobia than men ( $M = 46.87$ ,  $SD = 39.21$ ),  $t = -2.529$ ,  $p = .012$ , Cohen's  $d = 0.15$ .

### Associations with blood and injection phobia

Hypotheses H1C to H7C were all confirmed for blood and injection phobia, and again associations pointed in the directions we expected. Further, as expected (H8C), women ( $M = 5.31$ ,  $SD = 4.93$ ) presented more blood and injection phobia symptoms than men ( $M = 4.63$ ,  $SD = 4.61$ ),  $t = -2.399$ ,  $p = .017$ , Cohen's  $d = 0.14$ .

### Exploratory analyses

We analysed the associations between tryphobia, spider phobia, and blood and injection phobia and extraversion, agreeableness, and openness to experience exploratively. Results

showed that agreeableness and openness to experience were negatively related to symptoms of tryphobia, spider phobia, and blood and injection phobia (see Table 3). Extraversion was positively associated with symptoms of tryphobia but negatively with symptoms of blood and injection phobia.

## Discussion and conclusion

The aims of the current study were (a) to draw the contours of the nomological network of tryphobia by assessing the associations of a range of constructs related to the three anxiety disorder variables, and specific phobias in particular, with tryphobia; (b) to examine similarities and difference in such associations in comparison with those found with spider phobia and blood and injection phobia; and (c) to investigate the main effect of gender on tryphobia. We also wanted to replicate the association of gender with spider phobia and blood and injection phobia.

We hypothesized that conscientiousness would be negatively related to these three variables (H3A to H3C), whereas the following constructs would be positively related to them: behavioral inhibition (H1A to H1C), neuroticism (H2A to H2C), anxiety sensitivity (H4A to H4C), trait anxiety (H5A to H5C), disgust sensitivity (H6A to H6C), and disgust propensity (H7A to H7C). Finally, we hypothesized that women would present with more symptoms of tryphobia, spider phobia, and blood and injection phobia (H8A to H8C).

## Similarities in the nomological networks

A large majority of these hypotheses were supported in this study, as summarized in Table 4. We thus find the nomological network of tryphobia to be in appearance very similar to that of spider phobia and blood and injection phobia for the studied associations. Fig 1 presents a graphic summary of our results focusing on tryphobia symptoms, our main DV.

Indeed, we found higher symptoms of tryphobia, spider phobia, and blood and injection phobia in individuals who had high negative affectivity (neuroticism), were less conscientious, more worried about feeling anxious (anxiety sensitivity), and more anxious in general (trait anxiety), as well as individuals who experienced disgust frequently (disgust propensity) and were apprehensive about this emotion (disgust sensitivity). Regarding the exploratory analyses of the associations of other dimensions of personality with symptoms of tryphobia, spider phobia, and blood and injection phobia, we found that both agreeableness and openness to experience were negatively associated with all the DVs.

**Table 4. Summary of the hypothesis tests.**

| Hypothesis | Variable                  | Tryphobia | Spider phobia | Blood and injection phobia |
|------------|---------------------------|-----------|---------------|----------------------------|
| H1A–C      | Behavioral inhibition (+) |           |               | X                          |
| H2A–C      | Neuroticism (+)           | X         | X             | X                          |
| H3A–C      | Conscientiousness (–)     | X         | X             | X                          |
| H4A–C      | Anxiety sensitivity (+)   | X         | X             | X                          |
| H5A–C      | Trait anxiety (+)         | X         | X             | X                          |
| H6A–C      | Disgust sensitivity (+)   | X         | X             | X                          |
| H7A–C      | Disgust propensity (+)    | X         | X             | X                          |
| H8A–C      | Gender (women +)          |           | X             | X                          |

*Note.* Rows are the independent variables and columns the dependent variables. (+): Positive relationship hypothesized; (–): Negative relationship hypothesized. X: Hypothesis is supported.

<https://doi.org/10.1371/journal.pone.0257409.t004>

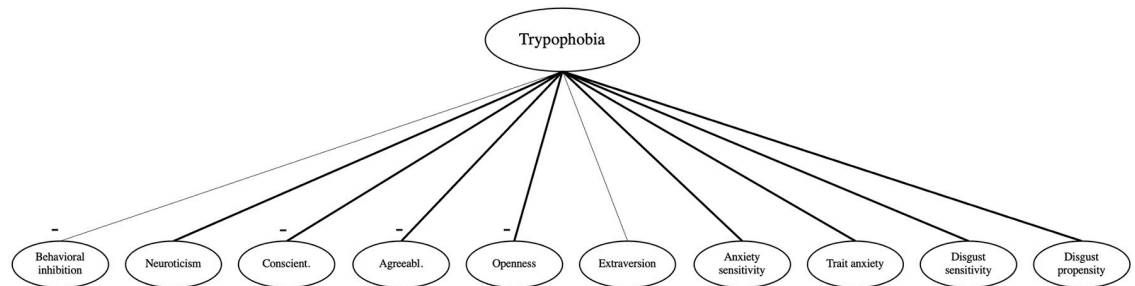

**Fig 1. Nomological net of tryphobia.** Thicker lines represent associations in common with spider phobia and blood and injection phobia.

<https://doi.org/10.1371/journal.pone.0257409.g001>

### Differences in the nomological networks

Despite these similarities, several differences could be observed. The association of withdrawal from unfamiliar situations (behavioral inhibition) was different for different target variables: It was positively associated with blood and injection phobia but negatively associated with tryphobia and spider phobia. Considering the exploratory analyses of the associations of other dimensions of personality with our DVs, it is worth noting that extraversion was positively associated with tryphobia, whereas it was negatively associated with blood and injection phobia and non-significantly associated with spider phobia. Another difference between tryphobia and the other target variables was that gender was not associated with tryphobia, whereas it was associated with spider phobia and blood and injection phobia (higher scores for women). These differences suggest the nomological network of tryphobia to be in part different from those of spider phobia and blood and injection phobia.

Examining the effect sizes in the tests of hypotheses pointed to further differences in the nomological networks. We relied on Cohen's [56] suggested thresholds for small, moderate, and large effect sizes (for H1A to H7C, partial  $r = .1$ : small effect; partial  $r = .3$ : moderate effect, partial  $r = .5$ : large effect; for H8A to H8C, Cohen's  $d = 0.2$ : small;  $d = .5$ : moderate,  $d = 0.8$ : large). Effect sizes appeared to be globally lower with regard to the associations of the independent variables with blood and injection phobia symptoms (H1C, H2C, H3C, H4C, H5C, H6C, H7C; average absolute value of partial  $r$ s = .26; on average, small effect sizes) compared with tryphobia symptoms (H1A, H2A, H3A, H4A, H5A, H6A, H7A; average absolute value of partial  $r$ s = .39; moderate) and spider phobia (H1B, H2B, H3B, H4B, H5B, H6B, H7B; average absolute value of partial  $r$ s = .36; moderate). Further examining the individual partial correlations (Table 3), one can see that the partial correlations testing hypotheses related to blood and injection phobia symptoms never crossed Cohen's threshold for large effect sizes, whereas this occurred for most of those related to tryphobia symptoms (H3A, H5A, H6A, H7A), and three of those related to spider phobia (H4B, H6B, H7B). The most important difference in effect sizes between the associations with the DVs relates to conscientiousness: the effect size was large for tryphobia symptoms, moderate for spider phobia symptoms, and small for blood and injection phobia symptoms.

### Strengths and limitations

One strength of our study was the well-balanced number of women and men participants, as this allowed the studied associations not to be driven by relationships found in one gender in particular. A second strength is that the sample size for this study, considerably higher than for most studies interested in tryphobia, afforded the detection of effects of different

magnitudes (ranging from small to large). Further, relying upon partial correlation tests allowed us to obtain estimates of association that were concise, comparable across instruments, and easily interpretable. A limitation of this study is that our sample is not representative of the general population, and we cannot guarantee that our findings could extend to other populations. This is because inferential statistics do not allow generalizing beyond the population from which the sample used for the analyses is drawn. Yet, it should be noted that findings similar to ours, in the relationships of specific phobia and the independent variables formerly assessed in the literature, are common (e.g., [32,33,36–38,41,44,45]). This study did not aim at investigating temporal relationships between independent and dependent variables and hence relied upon cross-sectional data. This is not per se a limitation, but further studies could explore such relationships.

In conclusion, the results of our study draw a clearer picture of the nomological net of tryphobia (depicted in Fig 1). That in the present study the nomological network of tryphobia includes many of the constructs related to specific phobias in past research hints at the possibility that tryphobia is also a specific phobia. But because we observed not only similarities but also differences between tryphobia and spider phobia as well as blood and injection phobia in terms of associations with the constructs of interest and their effect sizes, further studies are needed to clarify similarities and dissimilarities between tryphobia and specific phobia. Also, structural equation models could be used to test specific hypotheses about similarities and dissimilarities between the three target variables with respect to their associations with all other constructs assessed.

## Supporting information

**S1 Appendix.**  
(DOCX)

## Author Contributions

**Conceptualization:** Eric Mayor.

**Data curation:** Eric Mayor, Alessandro Miani.

**Formal analysis:** Eric Mayor, Andrea Meyer.

**Investigation:** Eric Mayor, Alessandro Miani.

**Methodology:** Eric Mayor, Andrea Meyer, Roselind Lieb.

**Project administration:** Eric Mayor.

**Resources:** Eric Mayor.

**Supervision:** Eric Mayor, Roselind Lieb.

**Validation:** Andrea Meyer.

**Writing – original draft:** Eric Mayor, Andrea Meyer, Roselind Lieb.

## References

1. McLean CP, Asnaani A, Litz BT, Hofmann SG. Gender differences in anxiety disorders: prevalence, course of illness, comorbidity and burden of illness. *J Psychiatr Res.* 2011; 45: 1027–1035. <https://doi.org/10.1016/j.jpsychires.2011.03.006> PMID: 21439576
2. Michael T, Zetsche U, Margraf J. Epidemiology of anxiety disorders. *Psychiatry.* 2007; 6: 136–142.

3. de Lijster JM, Dierckx B, Utens EM, Verhulst FC, Zieldorff C, Dieleman GC, et al. The age of onset of anxiety disorders: a meta-analysis. *Can J Psychiatry*. 2017; 62: 237–246. <https://doi.org/10.1177/0706743716640757> PMID: 27310233
4. Wittchen HU, Jacobi F, Rehm J, Gustavsson A, Svensson M, Jönsson B, et al. The size and burden of mental disorders and other disorders of the brain in Europe 2010. *Eur Neuropsychopharmacol*. 2011; 21: 655–679. <https://doi.org/10.1016/j.euroneuro.2011.07.018> PMID: 21896369
5. American Psychiatric Association. Diagnostic and statistical manual of mental disorders (DSM-5®). Washington: American Psychiatric Publishing; 2013.
6. Kupfer TR, Le AT. Disgusting clusters: tryphobia as an overgeneralised disease avoidance response. *Cogn Emot*. 2018; 32: 729–741. <https://doi.org/10.1080/02699931.2017.1345721> PMID: 28681640
7. Le AT, Cole GG, Wilkins AJ. Tryphobia: heart rate, heart rate variability and cortical haemodynamic response. *J Affect Disord*. 2020; 274: 1147–1151. <https://doi.org/10.1016/j.jad.2020.06.002> PMID: 32663944
8. Pipitone RN, Gallegos B, Walters D. Physiological responses to tryphobic images and further scale validity of the tryphobia questionnaire. *Pers Individ Differ*. 2017; 108: 66–68.
9. Ayzenberg V, Hickey MR, Lourenco SF. Pupillometry reveals the physiological underpinnings of the aversion to holes. *PeerJ*. 2018; 6: e4185. <https://doi.org/10.7717/peerj.4185> PMID: 29312818
10. Wabnegger A, Schwab D, Schienle A. The hole story: an event-related potential study with tryphobic stimuli. *Motiv Emot*. 2019; 43: 985–992.
11. Van Strien JW, Van der Peijl MK. Enhanced early posterior negativity in response to tryphobic stimuli. *Psychophysiology*. 2015; 52: S90.
12. Cole GG, Wilkins AJ. Fear of holes. *Psychol Sci*. 2013; 24: 1980–1985. <https://doi.org/10.1177/0956797613484937> PMID: 23982244
13. Pipitone RN, DiMattina C. Object clusters or spectral energy? Assessing the relative contributions of image phase and amplitude spectra to tryphobia. *Front Psychol*. 2020; 11: 1847. <https://doi.org/10.3389/fpsyg.2020.01847> PMID: 32793086
14. Vlok-Barnard M, Stein DJ. Tryphobia: an investigation of clinical features. *Braz J Psychiatry*. 2017; 39: 337–341. <https://doi.org/10.1590/1516-4446-2016-2079> PMID: 28423069
15. Wardenaar KJ, Lim CC, Al-Hamzawi AO, Alonso J, Andrade LH, Benjet C, et al. The cross-national epidemiology of specific phobia in the World Mental Health Surveys. *Psychol Med*. 2017; 47: 1744–1760. <https://doi.org/10.1017/S0033291717000174> PMID: 28222820
16. Le AT, Cole GG, Wilkins AJ. Assessment of tryphobia and an analysis of its visual precipitation. *Q J Exp Psychol*. 2015; 68: 2304–2322. <https://doi.org/10.1080/17470218.2015.1013970> PMID: 25635930
17. Imaizumi S, Furuno M, Hibino H, Koyama S. Tryphobia is predicted by disgust sensitivity, empathic traits, and visual discomfort. *SpringerPlus*. 2016; 5: 1449. <https://doi.org/10.1186/s40064-016-3149-6> PMID: 27652025
18. Coelho CM, Purkis H. The origins of specific phobias: influential theories and current perspectives. *Rev Gen Psychol*. 2009; 13: 335–348.
19. Seligman ME. Phobias and preparedness. *Behav Ther*. 1971; 2: 307–320.
20. Mowrer OH. Learning theory and behavior. Wiley, New York; 1960.
21. Wolpe J. Psychotherapy by reciprocal inhibition. Stanford: Stanford University Press; 1958.
22. Menzies RG, Clarke JC. The etiology of phobias: a nonassociative account. *Clin Psychol Rev*. 1995; 15: 23–48.
23. Mineka S, Öhman A. Phobias and preparedness: the selective, automatic, and encapsulated nature of fear. *Biol Psychiatry*. 2002; 52: 927–937. [https://doi.org/10.1016/s0006-3223\(02\)01669-4](https://doi.org/10.1016/s0006-3223(02)01669-4) PMID: 12437934
24. Can W, Zhuoran Z, Zheng J. Is tryphobia a phobia? *Psychol Rep*. 2017; 120: 206–218. <https://doi.org/10.1177/0033294116687298> PMID: 28558623
25. Schaller M, Park JH. The behavioral immune system (and why it matters). *Curr Dir Psychol Sci*. 2011; 20: 99–103.
26. Sasaki K, Yamada Y, Kuroki D, Miura K. Tryphobic discomfort is spatial-frequency dependent. *Adv Cogn Psychol*. 2017; 13: 224–231. <https://doi.org/10.5709/acp-0222-2> PMID: 29038664
27. Cisler JM, Olatunji BO, Lohr JM. Disgust, fear, and the anxiety disorders: a critical review. *Clin Psychol Rev*. 2009; 29: 34–46. <https://doi.org/10.1016/j.cpr.2008.09.007> PMID: 18977061
28. Sawchuk CN, Lohr JM, Westendorf DH, Meunier SA, Tolin DF. Emotional responding to fearful and disgusting stimuli in specific phobias. *Behav Res Ther*. 2002; 40: 1031–1046. [https://doi.org/10.1016/s0005-7967\(01\)00093-6](https://doi.org/10.1016/s0005-7967(01)00093-6) PMID: 12296488

29. Caseras X, Giampietro V, Lamas A, Brammer M, Vilarroya O, Carmona S, et al. The functional neuro-anatomy of blood-injection-injury phobia: a comparison with spider phobics and healthy controls. *Psychol Med*. 2010; 40: 125–134. <https://doi.org/10.1017/S0033291709005972> PMID: 19435544
30. Sarlo M, Palomba D, Angrilli A, Stegagno L. Blood phobia and spider phobia: two specific phobias with different autonomic cardiac modulations. *Biol Psychol*. 2002; 60: 91–108. [https://doi.org/10.1016/s0301-0511\(02\)00030-3](https://doi.org/10.1016/s0301-0511(02)00030-3) PMID: 12270586
31. de Jong PJ, Merckelbach H. Blood-injection-injury phobia and fear of spiders: domain specific individual differences in disgust sensitivity. *Pers Individ Differ*. 1998; 24: 153–158.
32. Van Overveld WJM, De Jong PJ, Peters ML, Cavanagh K, Davey GCL. Disgust propensity and disgust sensitivity: separate constructs that are differentially related to specific fears. *Pers Individ Differ*. 2006; 41: 1241–1252.
33. Tolin DF, Lohr JM, Sawchuk CN, Lee TC. Disgust and disgust sensitivity in blood-injection-injury and spider phobia. *Behav Res Ther*. 1997; 35: 949–953. [https://doi.org/10.1016/s0005-7967\(97\)00048-x](https://doi.org/10.1016/s0005-7967(97)00048-x) PMID: 9401135
34. Gladstone GL, Parker GB, Mitchell PB, Wilhelm KA, Malhi GS. Relationship between self-reported childhood behavioral inhibition and lifetime anxiety disorders in a clinical sample. *Depress Anxiety*. 2005; 22: 103–113. <https://doi.org/10.1002/da.20082> PMID: 16149043
35. Viana AG, Gratz KL. The role of anxiety sensitivity, behavioral inhibition, and cognitive biases in anxiety symptoms: structural equation modeling of direct and indirect pathways. *J Clin Psychol*. 2012; 68: 1122–1141. <https://doi.org/10.1002/jclp.21890> PMID: 22777955
36. Knappe S, Beesdo-Baum K, Fehm L, Stein MB, Lieb R, Wittchen HU. Social fear and social phobia types among community youth: differential clinical features and vulnerability factors. *J Psychiatr Res*. 2011; 45: 111–120. <https://doi.org/10.1016/j.jpsychires.2010.05.002> PMID: 20684833
37. Gladstone G, Parker G. Measuring a behaviorally inhibited temperament style: development and initial validation of new self-report measures. *Psychiatry Res*. 2005; 135: 133–143. <https://doi.org/10.1016/j.psychres.2005.03.005> PMID: 15922458
38. Sandstrom A, Uher R, Pavlova B. Prospective association between childhood behavioral inhibition and anxiety: a meta-analysis. *J Abnorm Child Psychol*. 2020; 48: 57–66. <https://doi.org/10.1007/s10802-019-00588-5> PMID: 31642030
39. Olatunji BO, Deacon B. Specificity of disgust sensitivity in the prediction of fear and disgust responding to a brief spider exposure. *J Anxiety Disord*. 2008; 22: 328–336. <https://doi.org/10.1016/j.janxdis.2007.03.007> PMID: 17433618
40. Olatunji BO, Haidt J, McKay D, David B. Core, animal reminder, and contamination disgust: three kinds of disgust with distinct personality, behavioral, physiological, and clinical correlates. *J Res Pers*. 2008; 42: 1243–1259.
41. Kotov R, Gamez W, Schmidt F, Watson D. Linking “big” personality traits to anxiety, depressive, and substance use disorders: a meta-analysis. *Psychol Bull*. 2010; 136: 768–821. <https://doi.org/10.1037/a0020327> PMID: 20804236
42. Naragon-Gainey K. Meta-analysis of the relations of anxiety sensitivity to the depressive and anxiety disorders. *Psychol Bull*. 2010; 136: 128–150. <https://doi.org/10.1037/a0018055> PMID: 20063929
43. Deacon B, Abramowitz J. Anxiety sensitivity and its dimensions across the anxiety disorders. *J Anxiety Disord*. 2006; 20: 837–857. <https://doi.org/10.1016/j.janxdis.2006.01.003> PMID: 16466904
44. Olatunji BO, Wolitzky-Taylor KB. Anxiety sensitivity and the anxiety disorders: a meta-analytic review and synthesis. *Psychol Bull*. 2009; 135: 974–999. <https://doi.org/10.1037/a0017428> PMID: 19883144
45. Olatunji BO, Williams NL, Lohr JM, Connolly KM, Cisler J, Meunier SA. Structural differentiation of disgust from trait anxiety in the prediction of specific anxiety disorder symptoms. *Behav Res Ther*. 2007; 45: 3002–3017. <https://doi.org/10.1016/j.brat.2007.08.011> PMID: 17888397
46. Levay KE, Freese J, Druckman JN. The demographic and political composition of Mechanical Turk samples. *Sage Open*. 2016; 6: 2158244016636433.
47. Hauser DJ, Schwarz N. Attentive Turkers: MTurk participants perform better on online attention checks than do subject pool participants. *Behav Res Methods*. 2016; 48: 400–407. <https://doi.org/10.3758/s13428-015-0578-z> PMID: 25761395
48. Ashton MC, Lee K. The HEXACO–60: a short measure of the major dimensions of personality. *J Pers Assess*. 2009; 91: 340–345. <https://doi.org/10.1080/00223890902935878> PMID: 20017063
49. Zettler I, Thielmann I, Hilbig BE, Moshagen M. The nomological net of the HEXACO model of personality: a large-scale meta-analytic investigation. *Perspect Psychol Sci*. 2020; 15: 723–760. <https://doi.org/10.1177/1745691619895036> PMID: 32324493
50. Eysenck HJ, Eysenck SBG. *Manual of the Eysenck Personality Inventory*. London: University of London Press; 1964.



51. Eysenck HJ, Eysenck SBG. Manual of the Eysenck Personality Questionnaire. London: Hodder & Stoughton/EdITS; 1975.
52. Taylor S, Zvolensky MJ, Cox BJ, Deacon B, Heimberg RG, Ledley DR, et al. Robust dimensions of anxiety sensitivity: development and initial validation of the Anxiety Sensitivity Index-3. *Psychol Assess*. 2007; 19: 176–188. <https://doi.org/10.1037/1040-3590.19.2.176> PMID: 17563199
53. Marteau TM, Bekker H. The development of a six-item short-form of the state scale of the Spielberger State-Trait Anxiety Inventory (STAI). *Br Journal Clin Psychol*. 1992; 31: 301–306.
54. Page AC, Bennett KS, Carter O, Smith J, Woodmore K. The Blood-Injection Symptom Scale (BISS): assessing a structure of phobic symptoms elicited by blood and injections. *Behav Res Ther*. 1997; 35: 457–464. [https://doi.org/10.1016/s0005-7967\(96\)00120-9](https://doi.org/10.1016/s0005-7967(96)00120-9) PMID: 9149456
55. Szymanski J, O'Donohue W. Fear of spiders questionnaire. *J Behav Ther Exp Psychiatry*. 1995; 26: 31–34. [https://doi.org/10.1016/0005-7916\(94\)00072-t](https://doi.org/10.1016/0005-7916(94)00072-t) PMID: 7642758
56. Cohen J. Statistical power analysis for the behavioral sciences. Hillsdale, NJ: Laurence Erlbaum Associates. 1988.
